1 **Intraspecific genetic and phenotypic diversity: parallel processes and correlated**  
2 **patterns?**

3

4 Fourniture Lisa<sup>1</sup>, Prunier Jérôme G.<sup>1</sup>, Mathieu-Bégné Églantine<sup>1, 2, 3</sup>, Canto Nicolas<sup>1</sup>, Veysière  
5 Charlotte<sup>2, 3</sup>, Loot Géraldine<sup>2, 3</sup> & Blanchet Simon<sup>1, 3</sup>

6

7 <sup>1</sup>Centre National de la Recherche Scientifique (CNRS), Université Sabatier (UPS), UMR  
8 5321 (Station d'Écologie Théorique et Expérimentale), Moulis, France

9 <sup>2</sup>Université de Toulouse, UPS, UMR 5174 (Laboratoire Évolution & Diversité Biologique,  
10 EDB), Toulouse, France

11 <sup>3</sup>CNRS, UPS, École Nationale de Formation Agronomique (ENFA), UMR 5174 EDB,  
12 Toulouse, France

## 13 **Introduction**

14           In non-clonal species, all individuals are genetically and phenotypically unique, which  
15 constitutes the most elemental facet of biological diversity. Intraspecific biodiversity plays a  
16 key role in evolutionary and ecological dynamics (Bolnick et al. 2003, Odling-Smee et al.  
17 2003). It is the raw material on which selection does act, potentially leading to adaptation to  
18 environmental changes, and improving population resilience to disturbances (Jung et al. 2013,  
19 Moran et al. 2015). Intraspecific diversity also affects the way populations modulate their  
20 biotic and abiotic environment, thus impacting community structure and ecosystem  
21 functioning (Hughes et al. 2008, Bolnick et al. 2011). Therefore, understanding patterns and  
22 underlying determinants of intraspecific diversity is of critical importance for ecological,  
23 evolutionary and conservation sciences (Chave 2013, Mimura et al. 2017).

24           As proposed for interspecific diversity, intraspecific diversity can be decomposed into  
25 two components: within-population (intraspecific  $\alpha$ -diversity) and between-population  
26 intraspecific diversity (intraspecific  $\beta$ -diversity) (Loreau 2000). Within-population  
27 intraspecific diversity corresponds to the diversity space covered by individuals composing a  
28 population, whereas between-population intraspecific diversity corresponds to the  
29 differentiation observed among populations pairs. Intraspecific diversity also comprises a  
30 genetic and a phenotypic facet, the former being inherited from the parents and the later being  
31 affected by both inherited and non-inherited (environmental) information. Intraspecific  
32 genetic diversity is here defined as the variability of neutral and non-neutral genetic sequences  
33 observed within and among populations (Holderegger et al. 2006), whereas phenotypic  
34 diversity encompasses the diversity of individuals' traits and includes behavioural,  
35 morphological and physiological traits (Violle et al. 2007).

36           Understanding how intraspecific diversity is maintained at the population level has  
37 long attracted ecologists and evolutionary biologists. For instance, the rise of molecular tools

38 in the last decades has generated many studies describing patterns of intraspecific neutral  
39 genetic diversity (e.g. through allelic richness and  $F_{ST}$ ), so as to unravel the demographic and  
40 evolutionary history of populations, and hence to improve their conservation and management  
41 (Manel et al. 2003, Reed and Frankham 2003, Blanchet et al. 2017). From an adaptive point  
42 of view, the relative importance of divergent natural selection in shaping the distribution of  
43 phenotypic traits across landscapes -and hence phenotypic -diversity- has been the focus of  
44 studies combining quantitative genetics and experimental approaches (Kawecki and Ebert  
45 2004, Leinonen et al. 2013, Blanquart et al. 2013). In parallel, ecologists have recently  
46 focused on the distribution of intraspecific phenotypic -diversity across species and  
47 landscapes in order to better appraise its roles for community dynamics (Violle et al. 2012,  
48 Moran et al. 2015, Siefert et al. 2015). However, the study of intraspecific diversity still lacks  
49 an integrative framework in which patterns of genetic and phenotypic ( - and -) diversity, as  
50 well as their underlying determinants, would be investigated simultaneously and considered  
51 as two potentially covarying facets of biological diversity. Remarkably, a framework in which  
52 two facets of biodiversity (namely species diversity and intraspecific genetic diversity) are  
53 studied in an integrative way has been introduced by Vellend (2005) and has generated an  
54 increasing number of studies (reviewed in Vellend et al. 2014, Lamy et al. 2017). These  
55 studies on species-genetic diversity correlations (SGDCs) led to a better understanding of the  
56 relationships between species and genetic diversity, as well as the processes shaping these  
57 facets of biodiversity in similar or contrasting ways (Taberlet et al. 2012, Vellend et al. 2014).

58 Studying genetic-phenotypic intraspecific diversity correlations (GPIDCs) within a  
59 framework analogous to the SGDCs framework is attractive since genetic and phenotypic  
60 intraspecific diversity are intrinsically related and can be influenced by the same set of  
61 adaptive and neutral processes (Lowe et al. 2017). For instance, in the case of non-neutral  
62 genetic markers and adaptive traits, a positive GPIDC is expected when genetic and

63 phenotypic non-neutral diversity are directly affected by environmental conditions (through  
64 selection and/or plasticity). In this case, both genetic and phenotypic -diversity are expected  
65 to be high in populations inhabiting highly heterogeneous environments, and both genetic and  
66 phenotypic -diversity are expected to be high between populations experiencing contrasting  
67 environmental conditions (Leimar 2005, Hedrick 2006, Wang and Bradburd 2014). Genetic  
68 and phenotypic diversity are also expected to be positively correlated if they are driven by  
69 neutral processes such as drift and dispersal (but see Edelaar et al. 2008, Lowe and McPeck  
70 2014), which can notably be the case for neutral genetic markers and phenotypic traits that are  
71 weakly affected by selection (Hartl and Clark 2007). In that case, genetic and phenotypic -  
72 diversity should be high in populations with large effective sizes and/or experiencing strong  
73 immigration. At the -level, genetic and phenotypic diversity should be high between  
74 populations of small population sizes (Prunier et al. 2017) and/or geographically isolated from  
75 one another (Hutchison and Templeton 1999). Finally, a positive GPIDC can be explained by  
76 a direct relationship between genetic and phenotypic diversity, notably when genetic diversity  
77 directly codes for the considered traits, or appropriately describes the whole genomic diversity  
78 (Hoffman et al. 2014). Conversely, when genetic and phenotypic diversity are driven by  
79 (uncorrelated) divergent processes, GPIDCs are expected to be weak and non-significant.

80 Here, we aimed at testing spatial covariations in genetic and phenotypic intraspecific  
81 diversity in two parapatric species inhabiting a spatially-structured landscape, and at  
82 unravelling underlying determinants of each diversity facet at the landscape scale. More  
83 specifically, we first quantified and described genetic and phenotypic intraspecific diversity in  
84 two parapatric freshwater fish species (*Gobio occitaniae* and *Phoxinus phoxinus*) across an  
85 entire river drainage. We then investigated both - and -GPIDCs for these two species, and  
86 we finally deciphered the parallel or independent determinants shaping - and - genetic and  
87 phenotypic diversity using causal analyses (Fourtune et al. 2018). To this end, we gathered

88 neutral genetic diversity and morphological diversity (a supposedly non-neutral type of trait)  
89 in both *G. occitaniae* and *P. phoxinus* so as to test whether or not the relative importance of  
90 main determinants of GPIDCs varied for species sharing a similar environment but with  
91 different life-history traits. We predicted that GPIDCs should be weak for the two species  
92 since neutral genetic diversity should mainly be driven by gene flow and/or drift, whereas  
93 morphology should be determined by local environmental characteristics. Alternatively, in  
94 river networks (Grant et al. 2007), factors affecting neutral processes (e.g. carrying capacity,  
95 geographic isolation, etc.) and adaptive processes (e.g. physico-chemical conditions such as  
96 water temperature, habitat heterogeneity, etc.) tend to covary along the network (e.g. upstream  
97 areas are generally homogeneous habitats with small carrying capacities whereas downstream  
98 areas are heterogeneous habitats with large carrying capacities) and these spatial covariation  
99 in underlying processes might generate strong GPIDCs. Moreover, the specific structure of  
100 river networks (treelike branching, constrained dispersal corridors, upstream-downstream  
101 environmental gradient) has already been theoretically and empirically shown to affect  
102 patterns of neutral and non-neutral diversity (Paz-Vinas and Blanchet 2015, Fronhofer and  
103 Altermatt 2017). Testing GPIDCs in highly spatially-structured landscapes such as dendritic  
104 riverine networks thus appears of particular interest.

105

106

## 107 **Materials and Methods**

108

### 109 *Collection of genetic and phenotypic data*

110 *Study species.* *Gobio occitaniae* (the Occitan gudgeon) and *Phoxinus phoxinus* (the  
111 European minnow) belong to the Cyprinidae family. Both species are insectivorous but differ  
112 in their foraging mode: *G. occitaniae* feeds predominantly on the bottom, whereas *P.*

113 *phoxinus* feeds in the water column. *Gobio occitaniae* mean body length (120-150mm) is  
114 slightly larger than that of *P. phoxinus* (80-90mm). Moreover these parapatric species have  
115 contrasting levels of habitat specialisation: *G. occitaniae* lives in many habitat types and is  
116 ubiquitous in many river basins whereas *P. phoxinus* is more likely to occur in upstream  
117 (cold) areas.

118 *Study area and sampling.* Fish were sampled across 48 sites evenly scattered across  
119 the Garonne-Dordogne river drainage (South-Western France). This river drainage covers a  
120 79 800km<sup>2</sup> area and sites were selected so as to cover the whole distribution of the two fish  
121 species, and hence their entire realized environmental niches. Electrofishing sampling was  
122 conducted during summers 2014 (42 sites) and 2015 (6 sites) and each site was visited once.  
123 Sampled area was of ~500-1000 m<sup>2</sup> to adequately represent the local habitat heterogeneity.  
124 *Gobio occitaniae* and *P. phoxinus* individuals were found in 39 and 34 sites respectively, with  
125 25 sites in which the species were found in sympatry (see Fig. 1). We sampled up to thirty  
126 individuals per species and per sampling site (range, 21-30 and 24-30 for *G. occitaniae* and *P.*  
127 *phoxinus* respectively, see Table S1), leading to the sampling of 1119 gudgeons and 978  
128 minnows. Sampled individuals were anaesthetised using oil of clove before being carefully  
129 aligned on their right side on a white dashboard including a reference scale. The left side of  
130 each individual was photographed using a digital camera (Canon G16©) mounted on a tripod.  
131 Subsequently, we collected on each individual a small piece of pelvic fin which was preserved  
132 in 70% ethanol for genetic analyses. Individuals were then released alive in their respective  
133 sampling site.

134 *Genetic data.* Genetic DNA was extracted from all samples using a salt-extraction  
135 protocol (Aljanabi and Martinez 1997). Genotyping was performed using 15 and 18  
136 microsatellite loci in *G. occitaniae* and *P. phoxinus* respectively. Accession numbers and  
137 conditions for polymerase chain reactions (PCR) are provided as supplementary material

138 (Appendix S1). Genotypes were analysed using GENEMAPPER 5.0 (Applied Biosystems©).  
139 The presence of null alleles was assessed at each locus using MICROCHECKER 2.2.3 (Van  
140 Oosterhout et al. 2004). We also checked for gametic disequilibrium using GENEPOP 4.2.1  
141 (Rousset 2008) after sequential Bonferroni correction to account for multiple tests. We  
142 discarded from further analyses any locus showing significant gametic disequilibrium and/or  
143 evidence of null alleles, leading to a total of 13 and 17 loci for *G. occitaniae* and *P. phoxinus*  
144 respectively (Appendix S1).

145 As a measure of genetic diversity, we computed for each species the allelic  
146 richness as the mean number of alleles across loci for a standardized sample size of 20 using  
147 ADZE 1.0 (Szpiech et al. 2008). As a measure of genetic diversity, we used three common  
148 indices based on allelic frequencies: Rousset's linearized  $F_{ST}$  ( $F_{ST}/(1-F_{ST})$ ), hereafter denoted  
149 as  $F_{ST}$  (Rousset 1997), Nei's version of Cavalli-Sforza's chord distance  $Da$  (Nei et al. 1983)  
150 and Jost's  $D$  (Jost 2008). Whatever the dataset, these three indices were highly correlated  
151 (Mantel  $r > 0.85$ ,  $p < 0.001$ ): for the sake of simplicity, we thus only retained  $F_{ST}$  as a measure  
152 of genetic differentiation. This metric of genetic differentiation is indeed the most commonly  
153 used on population genetics and most theoretical works have been developed on this metric.

154 *Phenotypic data.* Individuals morphology was analysed using a landmark-based  
155 geometric morphometrics approach (Rohlf and Marcus 1993). Sixteen homologous landmarks  
156 were defined so as to capture the overall body shape of each individual (Fig. 2). Landmarks  
157 coordinates were obtained from digitized pictures using the Pointpicker plugin  
158 (<http://bigwww.epfl.ch/thevenaz/pointpicker/>) in the ImageJ software (Schneider et al. 2012).  
159 As the distance between the camera and the fish slightly varied between sites, we size-  
160 corrected landmarks coordinates using the reference scale. For each species, landmarks were  
161 aligned using Generalized Procrustes Analysis (Rohlf and Slice 1990) with the R package  
162 *geomorph* (Adams and Otárola-Castillo 2013) in order to remove the effects of rotation,

163 translation and scale on shape variation. Relative warps ( $n = 32$ ) were computed for each  
164 individual by performing a Principal Component Analysis (PCA) on the aligned landmark  
165 coordinates of each species (Rohlf 1993). As the majority of the 32 relative warps explained a  
166 very small amount of variation, we only conserved for further analyses the first nine relative  
167 warps that together explained more than 85% of the variance in each data set (85.69% and  
168 85.32% for *G. occitaniae* and *P. phoxinus* respectively). These relative warps were used as  
169 shape variables. Individual centroid size, which is the square root of the sum of squared  
170 distances from landmarks to their centroid, was used as a surrogate of overall body size of  
171 each individual (Bookstein 1991).

172         Since relative warps are PCA coordinates, they can be seen as coordinates in a nine  
173 dimensions shape space (i.e. the hyperspace in which each point represents a configuration of  
174 landmarks) of each individual. Morphological  $\alpha$ -diversity was thus computed as the  
175 proportion of the total shape space (i.e. the shape space covered by all individuals from all  
176 populations for a given species) occupied by all individuals from a given population (see Fig.  
177 S2 for a graphical example), after accounting for differences in sampling sizes among  
178 populations using a random resampling approach. This index is equivalent to the functional  
179 richness index developed by Villéger et al. (2008) at the interspecific level. Morphological  $\beta$ -  
180 diversity was computed -for each species- as the euclidean distance between the consensus  
181 (i.e. the average shape in a population) of each populations pair (see Fig. S2). Additionally, in  
182 order to further decompose this index of differentiation, we computed the functional  
183 dissimilarity index  $F$  initially developed by Villéger et al. (2011) for interspecific diversity  
184 and informing the proportion of the total shape space that is not shared between two  
185 populations from a given pair:

186                                     
$$F = 1 - (\text{Volume shared})/(\text{Total volume})$$



187 F ranges from 0 to 1, with 0 indicating a perfect overlap in shape space occupation and 1  
188 indicating that no space is shared between two populations. Intermediate F can result from  
189 two (non-exclusive) mechanisms: turnover (the two populations fill distinct parts of the shape  
190 space with weak overlap) and nestedness (one population fills a small proportion of the shape  
191 space filled by the other) (Baselga 2010, Villéger et al. 2013). Consequently, we further  
192 computed  $F_{\text{pturn}}$ , the proportion of F that is due to trait turnover so as to tease apart the effect  
193 of nestedness and turnover. Because of computing limitations, these two indices were  
194 computed only from the first three relative warps coordinates. All indices were computed  
195 using functions available at <http://villeger.sebastien.free.fr/Rscripts.html>.

196

#### 197 *Collection of environmental data*

198 We gathered several variables related to environmental characteristics and river  
199 topography. These variables are likely to impact intraspecific diversity through evolutive  
200 and/or neutral processes. General predictions related to the effect of each variable on  
201 intraspecific diversity are listed in Table 1.

202 *Environmental characteristics.* Substrate type covering the river bed (i.e. the habitat  
203 for these fish species) was evaluated visually on each site following a predefined protocol:  
204 substrate was classified into nine categories based on particle size, ranging from silt (<  
205 0.05mm) to solid bedrock (see Table S3), and the percentage of each category composing the  
206 river bed of each site was estimated visually within a predefined area of ~100 m<sup>2</sup> that was  
207 representative of the sampling area. From these data, habitat heterogeneity was computed as  
208 the Pielou's evenness index, with low values identifying sites in which one of the substrate  
209 categories was dominant and hence relatively homogeneous habitats (large values indicated  
210 heterogeneous habitats with various substrate types). Habitat dissimilarities between sites  
211 were computed from percentages of substrate categories as Bray-Curtis distances, with a

212 value of 1 identifying two sites sharing no substrate categories (i.e. sites highly dissimilar in  
213 substrate types). The other environmental variables were obtained for each site from the  
214 database of the Water Information System of the Adour Garonne basin (SIEAG, "Système  
215 d'Information sur l'Eau du Bassin Adour Garonne", <http://adour-garonne.eaufrance.fr>) that  
216 gathers physico-chemical characteristics of surface water measured several times every year  
217 at numerous sites in the river catchment. Only sites for which data were available for July (a  
218 month in which the two species are highly active) of the years 2013, 2014 and 2015 were  
219 selected from the SIEAG database. The mean of the three values was calculated to inform the  
220 physico-chemical quality of the sites according to several parameters. We notably focused on  
221 two parameters directly affecting fish populations, i.e. oxygen saturation (%) (Crispo and  
222 Chapman 2008) and water temperature (°C) (Buisson et al. 2008). We gathered eleven  
223 additional variables informing overall water quality: concentrations in ammonium, azote,  
224 organic carbon, nitrate, nitrite, orthophosphate and phosphorus (mg/L), Biological Oxygen  
225 Demand (mg/L), water conductivity (mS/cm), pH and suspended matter (mg/L). We  
226 performed a PCA on these variables using R package "ade4" (Dray and Dufour 2007), and  
227 gathered the coordinates of each site on the first two axes (representing respectively 36.85%  
228 and 19.73% of the total variance) to create two synthetic variables (hereafter named  
229 *chemicals1* and *chemicals2*) informing water quality. High values of *chemicals1* correspond  
230 to high concentrations in ammonium, azote, organic carbon, phosphorus and a high Biological  
231 Oxygen Demand, whereas high values of *chemicals2* correspond to high concentrations in  
232 nitrate and nitrite and high values of conductivity, pH and suspended matter (see Fig. S4 for  
233 the graphical representation of the PCA).

234 *River topography.* River distances from the outlet and from the source for each site, as  
235 well as river distance between each pair of sites, were computed using QuantumGIS software  
236 (QGIS; Quantum GIS Development Team 2017). Elevation for each site was obtained from

237 the French Theoretical Hydrological Network (*Réseau Hydrologique Théorique français*,  
238 Pella et al. 2012). A PCA was performed on elevation and distance from the outlet. The  
239 coordinates of each site on the first axis, accounting for 92.99% of the variance, were used to  
240 create a synthetic variable, hereafter named *isolation*, with high values corresponding to sites  
241 of high altitude, located far from the outlet and that are expected to be highly isolated  
242 geographically. Additionally, the cumulative altitude differences between each pair of sites  
243 along the riverine network were computed using the MATLAB software-coding environment  
244 (Mathworks, Inc., scripts available upon request). River width, used as a proxy for habitat  
245 area and hence carrying capacity (Raeymaekers et al. 2008), was characterised by measuring  
246 river bed width at two randomly selected locations for each sampling site, and subsequently  
247 computing the mean of these two values. The betweenness centrality value of each site was  
248 computed using ComplexNetGIS toolbox in ArcGIS (Caschili 2010). Betweenness centrality  
249 is an index quantifying the connectivity and positional importance of a node within a network  
250 (Freeman 1977, Estrada and Bodin 2008).

251

### 252 *Statistical analyses*

253 Intraspecific genetic and phenotypic - and -diversities were compared between  
254 species using Wilcoxon rank sum test. Spearman rank correlations and Mantel tests were then  
255 used to assess and statistically test the significance of the correlations -for each species  
256 separately- between genetic and phenotypic diversity, at the - and -levels respectively.

257 The d-sep test (Shipley 2000, 2013) was used to unravel the relationships between  
258 environmental characteristics, topographical variables and intraspecific phenotypic and  
259 genetic diversity at the - and -levels. The d-sep test is a type of path (causal) analysis  
260 method computing the significance and likelihood of a causal model through the test of the  
261 conditional independences (named d-separations; Pearl and Verma 1987) that should be true

262 if the model fits the data. A non-significant p-value associated with the null hypothesis that  
263 "the model fits the data" indicates that the observed data are consistent with the tested model.  
264 This method is very flexible as the statistical method used to test the independences is  
265 selected according to the data, which allowed in our case modelling both point summary ( -  
266 diversity) and pairwise ( -diversity) data types (Fourtune et al. 2018). Prior to analyses,  
267 environmental variables were log-transformed if needed to obtain a normal distribution, and  
268 all variables were centred to the mean and scaled.

269 At the  $\alpha$ -level, we defined a causal model in which intraspecific genetic and  
270 phenotypic diversity were both linked one to the other and linked to oxygen saturation, water  
271 temperature, habitat heterogeneity, *chemicals1*, *chemicals2*, connectivity, *isolation*, and  
272 habitat area (see Table 1 for specific predictions). As some of the topological and  
273 environmental variables are expected to covary spatially, paths taking into account these  
274 covariations were included when needed. This model was tested using a d-sep test in which d-  
275 separations (i.e. path coefficients) were tested using linear regressions. This model was then  
276 simplified by removing paths one by one until reaching the model with the lowest Akaike  
277 Information Criteria (hereafter AIC; Burnham and Anderson 2002) so as to identify the main  
278 determinants underlying phenotypic and genetic  $\alpha$ -diversity.

279 For genetic and phenotypic  $\alpha$ -diversity, four environmental variables (oxygen  
280 saturation, temperature, *chemicals1* and *chemicals2*) were converted into pairwise  
281 environmental differences between sites using euclidean distances. Differences in habitat  
282 area, used as a proxy for carrying capacity and hence for the effect of genetic drift, were  
283 computed as *di* (distance based on the inverse; Relethford 1991) as recommended in Prunier  
284 et al. (2017). Additionally, we considered the three variables already taking the form of  
285 pairwise matrices: topographic distances, differences in cumulative altitude and habitat  
286 dissimilarities between sites. We defined a model in which genetic and phenotypic  $\alpha$ -diversity

287 were both linked one to the other and linked to these eight explanatory variables. A full model  
288 was tested using a d-sep test procedure recently developed for handling pairwise matrices  
289 (Fourtune et al. 2018) and that uses permutations-based linear regressions. This model was  
290 simplified using the same procedure as above, until reaching the model with the lowest AIC  
291 score.

292 As a side objective aiming at better understanding the spatial distribution of  
293 phenotypic diversity in the two fish species, we investigated phenotype-environment  
294 relationships by assessing and testing relationships between the individual shape of fish and  
295 raw environmental variables. For the sake of clarity, only the first two relative warps  
296 (respectively encompassing 31.3% and 15.5% of the variance in *G. occitaniae* and 27% and  
297 21.9% of the variance in *P. phoxinus*) were separately considered in this analysis combining  
298 model selection and model averaging. Global models (one per relative warp and per species)  
299 linking relative warps to the environmental variables and their associated quadratic terms  
300 were implemented using the *lme* function in R package `nlme` (Pinheiro et al. 2016) with the  
301 population identity included as a random-intercept effect. We also added individual centroid  
302 size and its quadratic term as explanatory variables to take the effects of allometry into  
303 account (Outomuro and Johansson 2017). All possible models were generated from the global  
304 model and their AIC were computed using the *dredge* function in the R package `MuMIn`  
305 (Barto 2016). Full model averaging was then applied across the best models (  $AIC < 4$ ;  
306 Burnham and Anderson 2002) with the function *model.avg* in order to estimate the relative  
307 importance of each explanatory variable and weighted estimates associated to explanatory  
308 variables. All statistical analyses were performed with the R software (R Development Core  
309 Team 2017).

310

311

312 **Results**

313

314 *Alpha- and -intraspecific diversity*

315 Both genetic and phenotypic  $\alpha$ -diversity were higher for *P. phoxinus* than for *G.*  
316 *occitaniae* (Wilcoxon rank sum tests,  $W = 149$ ,  $P < 0.001$  for genetic  $\alpha$ -diversity;  $W = 340$ ,  $P$   
317  $< 0.001$  for phenotypic  $\alpha$ -diversity; Fig. 3a and 3b), indicating that minnow populations were  
318 on average more diverse genetically and phenotypically than gudgeon populations. However,  
319 within-species, we did not find significant correlations between genetic and phenotypic  $\alpha$ -  
320 diversity (i.e.  $\alpha$ -GPIDCs) for any of the two species (Spearman rank correlation tests,  $r =$   
321  $0.105$ ,  $P = 0.521$  in *G. occitaniae* and  $r = 0.016$ ,  $P = 0.927$  in *P. phoxinus*, Fig. 4a and 4b).

322 Mean between-sites genetic  $\alpha$ -diversity was in average lower in *G. occitaniae* than in  
323 *P. phoxinus* (Wilcoxon rank sum test,  $W = 245$ ,  $P < 0.001$ , Fig. 3c), whereas the reverse held  
324 true for mean phenotypic  $\alpha$ -diversity per site (Wilcoxon rank sum test,  $W = 1284$ ,  $P < 0.001$ ,  
325 Fig. 3d); gudgeon populations were -in average- less genetically differentiated than minnow  
326 populations but more phenotypically differentiated. The fact that *G. occitaniae* populations  
327 were more phenotypically differentiated was confirmed using  $F_{\beta}$  (Wilcoxon rank sum test,  $W$   
328  $= 1259$ ,  $P < 0.001$ ; Fig. S5). We further found that phenotypic turnover (measured as  $F_{\text{pturn}}$ )  
329 was also higher for *G. occitaniae* populations than for *P. phoxinus* populations (Wilcoxon  
330 rank sum test,  $W = 981$ ,  $P < 0.001$ ; Fig. S5). Remarkably, for 116 out of 741 populations pairs  
331 of gudgeon,  $F_{\beta}$  and  $F_{\text{pturn}}$  were equal to 1, indicating no overlap in the portions of the shape  
332 space occupied by populations, whereas in *P. phoxinus*, none of the populations pair had  
333 values of  $F_{\beta}$  and  $F_{\text{pturn}}$  equal to 1. The correlation between genetic and phenotypic  $\alpha$ -diversity  
334 was positive and significant in *G. occitaniae* (i.e. significant  $\alpha$ -GPIDC, Mantel test,  $r = 0.358$ ,  
335  $P = 0.001$ , Fig. 4c) but not in *P. phoxinus* (Mantel test,  $r = -0.011$ ,  $P = 0.521$ , Fig. 4d).

336

337 *Determinants of* - and -GPIDCs.

338 -GPIDCs. In *G. occitaniae* and *P. phoxinus*, the models with the lowest AIC scores  
339 were well supported by the data, as indicated by non-significant p-values associated with the  
340 tests of conditional independences ( $C = 75.485$ , d.f. = 74,  $P = 0.389$  for *G. occitaniae* and  $C =$   
341  $76.524$ , d.f. = 72,  $P = 0.335$  for *P. phoxinus*, Table 2a). In *G. occitaniae*, we found a negative  
342 effect of *isolation* on both genetic and phenotypic -diversity, indicating that populations  
343 were genetically and phenotypically impoverished in sites situated at high altitude and far  
344 from the river mouth. Additionally, phenotypic -diversity tended to be negatively related to  
345 connectivity (Fig. 5a). In *P. phoxinus*, genetic -diversity was also negatively related to  
346 *isolation*, but not phenotypic -diversity (Fig. 5b). Genetic -diversity was also positively  
347 related to habitat area. Phenotypic -diversity was negatively correlated to oxygen saturation,  
348 which was in turn positively associated with *isolation* and habitat area (Fig. 5b).

349 -GPIDCs. The models with the lowest AIC scores were well supported by the data in  
350 both species ( $C = 109.167$ , 92 d.f.,  $P = 0.130$  in *G. occitaniae* and  $C = 97.699$ , 94 d.f.,  $P =$   
351  $0.575$  in *P. phoxinus*, Table 2b). For *G. occitaniae*, genetic -diversity was positively related  
352 to the cumulative difference in altitude, which was itself related to riverine distance (leading  
353 to an indirect relationship between genetic -diversity and riverine distance, Fig. 5c).  
354 Phenotypic -diversity was positively correlated to three environmental variables (difference  
355 in oxygen concentration, difference in water temperature and habitat dissimilarity, Fig. 5d).  
356 Additionally, we found a positive relationship between genetic and phenotypic -diversity  
357 (Fig. 5d). Regarding *P. phoxinus*, genetic -diversity was positively related to riverine  
358 distance both directly and indirectly through difference in altitude and difference in habitat  
359 area. Genetic -diversity was also negatively related to difference in oxygen. Phenotypic -  
360 diversity was directly related to difference in connectivity and indirectly related to pairwise  
361 riverine distance through difference in altitude and habitat area (Fig. 5d).

362

363 *Phenotype-environment relationships.*

364 In *G. occitaniae*, the first relative warp had high values in individuals living in sites  
365 with high concentration in oxygen ( $\beta = 0.272$ , CI = [0.138; 0.406]) and low water temperature  
366 ( $\beta = -0.236$ , CI = [-0.367; -0.105]), and where the proportion of silt in the substrate was low  
367 ( $\beta = -0.268$ , CI = [-0.401; -0.136]) (Table 3). Additionally, the first relative warp was related  
368 to individual centroid size (used as a proxy for individual size) and its quadratic term ( $\beta =$   
369  $0.513$ , CI = [0.469; 0.557] and  $\beta = -0.106$ , CI = [-0.136; -0.076] respectively), suggesting  
370 allometric relationships with this relative warp. None of the environmental variables we  
371 considered were likely to be associated to the second relative warp. In *P. phoxinus*, the first  
372 and second relative warps were significantly associated to the individual centroid size ( $\beta =$   
373  $0.455$ , CI = [0.392; 0.518] and  $\beta = -0.342$ , CI = [-0.413; -0.271] respectively), which also  
374 suggests allometric relationships. Surprisingly, we found no phenotype-environment  
375 relationships in *P. phoxinus*, suggesting that, in this species, most of the phenotype variations  
376 we detected were independent of environmental characteristics and topography.

377

378

## 379 **Discussion**

380

381 In this study, we tested for Genetic-Phenotypic Intraspecific Diversity correlations  
382 (GPIDCs) in two parapatric freshwater fish species, and explored the processes shaping the  
383 spatial distribution of their genetic and phenotypic characteristics. Our results revealed  
384 disparities in the distribution of genetic and phenotypic diversity in the two species, as well as  
385 common and contrasted processes shaping diversity at the - and -levels.

386



387 In terms of genetic diversity, we found that, overall, *P. phoxinus* populations were  
388 more locally diverse (higher neutral genetic diversity) and more differentiated (higher  
389 neutral genetic diversity) than *G. occitaniae* populations (Fig. 3a and 3c). The overall  
390 higher genetic diversity in *P. phoxinus* may indicate different evolutionary histories  
391 between the two species. For instance, this may indicate that ancient effective population sizes  
392 were higher and more stable over time in *P. phoxinus* than in *G. occitaniae*, thus limiting the  
393 impact of drift, and/or that multiple glacial refugia existed in *P. phoxinus*, hence favouring the  
394 maintenance of a high neutral genetic diversity (Hewitt 1999). The overall high genetic  
395 diversity found in *P. phoxinus* populations may also result from high levels of biological  
396 connectivity in this species when compared to *G. occitaniae* (Frankham 1996) as suggested  
397 by spatial patterns of isolation-by-distance (Appendix SX). We also found that local levels of  
398 neutral genetic diversity in *P. phoxinus* were lower in sites of small habitat area (Fig. 5a),  
399 indicating an increased effect of genetic drift in habitat with small carrying capacity. This  
400 relationship between neutral genetic diversity and habitat area was not observed in *G.*  
401 *occitaniae*, probably because of a sampling bias, as *G. occitaniae* was generally found at  
402 lower altitudes and thus in stretches of higher carrying capacity than *P. phoxinus* (mean  
403 habitat area: 29.9 m and 16.2 m in *G. occitaniae* and *P. phoxinus* respectively; anova on log-  
404 transformed data:  $F = 4.16$ ,  $df = 71$ ,  $p = 0.06$ ). Higher overall levels of neutral genetic  
405 diversity in *P. phoxinus* (Fig. 3c) may also be explained by this possible altitudinal sampling  
406 bias, responsible for higher spatial heterogeneity in the influence of drift (Prunier et al. 2017).  
407 Accordingly, we observed a positive impact of differences in habitat areas on genetic  
408 diversity in *P. phoxinus* (Fig. 5d), indicating that -as expected- populations experiencing  
409 contrasted intensity of genetic drift were more genetically differentiated (Prunier et al. 2017).

410 Despite these differences, we found common processes driving genetic diversity in  
411 both species. First, we found that neutral genetic diversity was strongly related to

412 geographic isolation in both species, with lower genetic diversity observed in highly isolated  
413 sites, i.e. sites at high altitude and far from the river mouth (Fig. 5a-b). This decrease in  
414 neutral genetic diversity in geographically isolated sites has already been reported, and has  
415 actually been suggested to be a general pattern in riverine networks (Paz-Vinas et al. 2015).  
416 Two non-exclusive hypotheses can explain this pattern. First, movements between  
417 populations might be directionally-biased due to water flow (Morrissey and de Kerckhove  
418 2009, Paz-Vinas et al. 2013). This asymmetric dispersal leads to an increase in gene flow  
419 from upstream (isolated sites) to downstream, generating an upstream loss of genetic diversity  
420 through emigration (Kawecki and Holt 2002). Alternatively, a decrease in genetic diversity in  
421 upstream sites might reflect the species colonization history from downstream glacial refugia.  
422 Second, genetic diversity was driven by topographic features in both species (Fig. 5a-b); in  
423 *G. occitaniae*, genetic differentiation was higher between sites isolated from each other by  
424 high altitude drops along the network, whereas in *P. phoxinus*, genetic differentiation was  
425 higher between sites separated by a high riverine distance. These two latter patterns confirm  
426 the existence of a process of isolation-by-distance (Hutchison and Templeton 1999) in the two  
427 species (supplementary material Appendix SX).

428

429 At the phenotypic level, our findings suggest that the regional pool in *G. occitaniae*  
430 was composed of poorly diverse local populations (low phenotypic diversity; Fig. 3b) that  
431 were highly dissimilar from one site to another (high phenotypic diversity with high  
432 turnover between populations, i.e. different populations display different phenotypes; Fig. 3d).  
433 Conversely, in *P. phoxinus*, phenotypic diversity was higher and phenotypic diversity was  
434 lower than in *G. occitaniae*, which suggests that the regional pool of *P. phoxinus* was  
435 composed of highly diverse local populations that were highly similar from one site to  
436 another. The contrasted morphological patterns found in these two parapatric species may

437 result (i) from higher effective population sizes in *P. phoxinus* than in *G. occitaniae* (as  
438 suggested by measures of genetic  $\beta$ -diversity, see above), and/or (ii) from stronger effects of  
439 selection (or environmental effects in general) in *G. occitaniae* than in *P. phoxinus*. Indeed, a  
440 stronger effect of selection is expected to lead to environmental filtering and hence to less  
441 phenotypically diverse populations at the local scale (local adaptation) as well as to a high  
442 phenotypic  $\beta$ -diversity between populations resulting from adaptive divergence (and/or strong  
443 plastic effects) (Blanquart et al. 2013). This later hypothesis was strengthened by the  
444 significant relationships found between the individual shapes in *G. occitaniae* and three  
445 environmental variables (see below), and by the limited scale of gene flow in *G. occitaniae*  
446 when compared to isolation-by-distance pattern in *P. phoxinus* (supplementary material  
447 Appendix SX). Despite the strong environmental heterogeneity measured among sites, *P.*  
448 *phoxinus* populations appeared highly similar suggesting a higher level of generalism in *P.*  
449 *phoxinus* populations than in possibly more specialist *G. occitaniae* populations, as well as a  
450 homogenizing influence of effective dispersal in *P. phoxinus*.

451 In line with this result, we found highly contrasted processes shaping phenotypic  
452 diversity in both species. In *G. occitaniae*, phenotypic  $\beta$ -diversity was lower in highly-  
453 connected sites, with a high centrality index (Fig. 5a). This result was unexpected since highly  
454 central sites are expected to receive more dispersers, hence enhancing phenotypic diversity  
455 and impeding local adaptation. However, the observed pattern could be explained by a higher  
456 efficiency of selection in central sites in which dispersal introduces additional phenotype  
457 variability necessary for adaptation (Lenormand 2002), potentially in combination with a  
458 habitat matching process, that would hinder the negative impact of gene flow on local  
459 adaptation (Edelaar et al. 2008). Alternatively -and not-exclusively- this negative relationship  
460 could arise from a statistical bias, for instance if an unmeasured collinear variable explained  
461 both centrality and phenotypic  $\beta$ -diversity. However, phenotypic  $\beta$ -diversity tended to be

462 lower in isolated sites (in which, according to our former hypothesis, populations are expected  
463 to be less locally adapted and hence more diverse), which may suggest an effect of neutral  
464 processes (phenotypic drift) as observed in neutral genetic diversity, and/or stronger effects  
465 of environmental filtering in isolated sites (high altitude and far from the river mouth) than in  
466 less isolated sites. This latter hypothesis of strong environmental filtering is likely given that  
467 upstream (isolated) sites are known to experience harsh environmental conditions (Vannote et  
468 al. 1980). Furthermore, in *G. occitaniae*, phenotypic diversity was primarily shaped by  
469 environmental variables related to habitat and water features (namely, difference in oxygen  
470 saturation, temperature and habitat dissimilarity) such that mean phenotype was different  
471 between sites displaying contrasted abiotic conditions (Fig. 5c). This impact of environment  
472 on phenotype was strengthened by the direct relationships found between individual  
473 phenotype and oxygen saturation, temperature and proportion of silt in the habitat. These two  
474 results confirm the hypothesis that selection (or environment in general) has strong effects on  
475 phenotype in *G. occitaniae*, however it remains unclear whether these effects originate from  
476 heritable differentiation or environmentally induced plasticity.

477 In *P. phoxinus*, phenotypic diversity was higher in sites with low oxygen  
478 concentration, suggesting a positive influence of stressful conditions on phenotypic  
479 diversity (Fig. 5b). This result was surprising as we expected that a low saturation in oxygen  
480 would sustain small population sizes, hence reducing phenotypic diversity. Moreover,  
481 stressful conditions were expected to strengthen selection pressure. However, stressful  
482 conditions have already been proven to have a positive effect on intraspecific diversity,  
483 notably (i) when they lead to an increase of mutation and recombination rates in non-neutral  
484 parts of the genome (Badyaev 2005), and (ii) when they lead to an increase in phenotypic  
485 plasticity (Ghalambor et al. 2007, Rey et al. 2016). Phenotypic diversity was increased  
486 between populations inhabiting sites of different area and different connectivity (Fig. 5d).

487 These relations may suggest an effect of neutral processes associated with population sizes  
488 and gene flow on phenotypic diversity, which is likely as local adaptation does not appear to  
489 be high in this species.

490

491 We found no GPIDCs at the  $\alpha$ -level in either species, indicating that neutral genetic  $\alpha$ -  
492 diversity and phenotypic  $\alpha$ -diversity are driven by independent processes. Although consistent  
493 with our theoretical expectations, this result was surprising in *G. occitaniae* as we found a  
494 similar impact of isolation on genetic and phenotypic  $\alpha$ -diversity. This absence of correlation  
495 suggests that the influence of other processes (related to connectivity) were strong enough to  
496 break spatial covariation between these two facets of diversity in this species.

497 At the  $\beta$ -level, we found a significant and positive GPIDC in *G. occitaniae*, such that  
498 populations being genetically different were also phenotypically different. However, this  
499 correlation did not seem to originate from similar environmental processes shaping both  
500 facets of  $\beta$ -diversity but appeared to be mainly caused by a direct effect of one facet of  $\beta$ -  
501 diversity on the other. It was not possible to statistically determine the direction of this  
502 relation (genetic diversity to phenotypic diversity or phenotypic diversity to genetic diversity)  
503 due to methodological limitations. However, given that we focused on neutral genetic  
504 markers, a direct impact of genetic  $\beta$ -diversity on phenotypic  $\beta$ -diversity seems unlikely  
505 except if we assume (i) that the here chosen microsatellite markers properly reflect the  
506 genomic diversity in this species and (ii) that phenotypic diversity in this species is mainly  
507 driven by the genetic background of individuals. Alternatively, positive assortative mating  
508 (i.e. the propensity to mate with phenotypically similar individuals) has been shown to be  
509 particularly strong in fish (Jiang et al. 2013) and could explain this direct relation between  
510 phenotypic and genetic differentiation (Wang and Summers 2010). Yet, although our dataset  
511 encompasses the main environmental variables known to be involved in adaptive and neutral

512 processes in freshwater fish, we cannot rule out the influence of a possible unmeasured abiotic  
513 or biotic factor impacting both facets of  $\alpha$ -diversity. In *P. phoxinus*, genetic and phenotypic  $\alpha$ -  
514 diversity were not correlated despite of a similar impact of habitat area on both facets of  
515 diversity. Other important processes involving riverine distance and connectivity could  
516 impede spatial covariation between these two facets of diversity in this species.

517

518 The use of an integrative framework allowed us to unveil striking dissimilarities  
519 between the patterns and drivers of genetic and phenotypic intraspecific diversity in two  
520 parapatric freshwater fish species. First, we found indications of limited gene flow and of  
521 local adaptation in *G. occitaniae* populations. Second, we observed that, in *P. phoxinus*,  
522 populations were phenotypically more diverse and that gene flow occurred at a larger spatial  
523 scale. This high phenotypic diversity could indicate a bet-hedging strategy (i.e. the  
524 augmentation of phenotypic diversity to optimize fitness in varying environments), possibly  
525 in response to inter-annual variation in local flow regimes (Lytle and Poff 2004). Studying  
526 neutral genetic diversity and phenotypic diversity within an integrative framework hence  
527 appeared as a valuable way of deciphering the complex and diverse impacts of neutral and  
528 adaptive processes on intraspecific diversity.

529 While introducing the novel framework of Species-Genetic Diversity Correlation,  
530 Vellend (2005) stated that treating interspecific and intraspecific diversity as independent  
531 phenomena in community ecology and population genetics was irrelevant. Similarly, genetic  
532 and phenotypic diversity are clearly interrelated but are mainly studied separately in  
533 population genetics and functional ecology. We advocate for a greater integration across  
534 disciplinary boundaries in future studies in order to advance our understanding of the  
535 distribution of intraspecific diversity.

536

537 **References**

- 538 Adams, D. C., and E. Otárola-Castillo. 2013. geomorph: an R package for the collection and  
539 analysis of geometric morphometric shape data. *Methods in Ecology and Evolution*  
540 4:3936399.
- 541 Aljanabi, S. M., and I. Martinez. 1997. Universal and rapid salt-extraction of high quality  
542 genomic DNA for PCR-based techniques. *Nucleic acids research* 25:469264693.
- 543 Badyaev, A. V. 2005. Stress-induced variation in evolution: from behavioural plasticity to  
544 genetic assimilation. *Proceedings of the Royal Society of London B: Biological*  
545 *Sciences* 272:8776886.
- 546 Barto , K. 2016. MuMIn: Multi-Model Inference.
- 547 Baselga, A. 2010. Partitioning the turnover and nestedness components of beta diversity.  
548 *Global Ecology and Biogeography* 19:1346143.
- 549 Blanchet, S., J. G. Prunier, and H. De Kort. 2017. Time to Go Bigger: Emerging Patterns in  
550 Macrogenetics. *Trends in Genetics* 33:5796580.
- 551 Blanquart, F., O. Kaltz, S. L. Nuismer, and S. Gandon. 2013. A practical guide to measuring  
552 local adaptation. *Ecology Letters* 16:119561205.
- 553 Bolnick, D. I., P. Amarasekare, M. S. Araújo, R. Bürger, J. M. Levine, M. Novak, V. H. W.  
554 Rudolf, S. J. Schreiber, M. C. Urban, and D. A. Vasseur. 2011. Why intraspecific trait  
555 variation matters in community ecology. *Trends in Ecology & Evolution* 26:1836192.
- 556 Bolnick, D. I., R. Svanbäck, J. A. Fordyce, L. H. Yang, J. M. Davis, C. D. Hulsey, and M. L.  
557 Forister. 2003. The ecology of individuals: incidence and implications of individual  
558 specialization. *The American Naturalist* 161:1628.
- 559 Bookstein, F. L. 1991. *Morphometric Tools for Landmark Data: Geometry and Biology*.  
560 Cambridge University Press, Cambridge ; New York, NY.

- 561 Buisson, L., L. Blanc, and G. Grenouillet. 2008. Modelling stream fish species distribution in  
562 a river network: the relative effects of temperature versus physical factors. *Ecology of*  
563 *Freshwater Fish* 17:2446257.
- 564 Burnham, K. P., and D. R. Anderson. 2002. *Model Selection and Multimodel Inference: A*  
565 *Practical Information-Theoretic Approach*. 2nd edition. Springer Verlag, New York,  
566 NY.
- 567 Caschili, S. 2010. ComplexNetGIS: a tool for the analysis of complex spatial networks. Pages  
568 2336242 *in* G. Las Casas, P. Pontrandolfi, and B. Murgante, editors. *Informatica e*  
569 *pianificazione urbana e territoriale*. Libria, Melfi.
- 570 Chave, J. 2013. The problem of pattern and scale in ecology: what have we learned in  
571 20 years? *Ecology Letters* 16:4616.
- 572 Crispo, E., and L. J. Chapman. 2008. Population genetic structure across dissolved oxygen  
573 regimes in an African cichlid fish. *Molecular Ecology* 17:213462148.
- 574 Dray, S., and A.-B. Dufour. 2007. The ade4 Package: Implementing the Duality Diagram for  
575 Ecologists. *Journal of Statistical Software* 22:1620.
- 576 Edelaar, P., A. M. Siepielski, and J. Clobert. 2008. Matching Habitat Choice Causes Directed  
577 Gene Flow: A Neglected Dimension in Evolution and Ecology. *Evolution* 62:24626  
578 2472.
- 579 Estrada, E., and Ö. Bodin. 2008. Using network centrality measures to manage landscape  
580 connectivity. *Ecological Applications* 18:181061825.
- 581 Fourtune, L., I. Paz-Vinas, G. Loot, J. G. Prunier, and S. Blanchet. 2016. Lessons from the  
582 fish: a multi-species analysis reveals common processes underlying similar species-  
583 genetic diversity correlations. *Freshwater Biology* 61:183061845.



- 584 Fourtune, L., J. G. Prunier, I. Paz-Vinas, G. Loot, C. Veysière, and S. Blanchet. 2018.  
585 Inferring Causalities in Landscape Genetics: An Extension of Wright's Causal  
586 Modeling to Distance Matrices. *The American Naturalist*:4916508.
- 587 Frankham, R. 1996. Relationship of Genetic Variation to Population Size in Wildlife.  
588 *Conservation Biology* 10:150061508.
- 589 Freeman, L. 1977. A Set of Measures of Centrality Based on Betweenness. *Sociometry*  
590 40:35641.
- 591 Fronhofer, E. A., and F. Altermatt. 2017. Classical metapopulation dynamics and eco-  
592 evolutionary feedbacks in dendritic networks. *Ecography*.
- 593 Ghalambor, C. K., J. K. McKAY, S. P. Carroll, and D. N. Reznick. 2007. Adaptive versus  
594 non-adaptive phenotypic plasticity and the potential for contemporary adaptation in  
595 new environments. *Functional Ecology* 21:3946407.
- 596 Grant, E. H. C., W. H. Lowe, and W. F. Fagan. 2007. Living in the branches: population  
597 dynamics and ecological processes in dendritic networks. *Ecology Letters* 10:1656  
598 175.
- 599 Hartl, D. L., and A. G. Clark. 2007. *Principles of population genetics*. 4th edition. Sinauer  
600 Associates, Sunderland, MA.
- 601 Hedrick, P. W. 2006. Genetic Polymorphism in Heterogeneous Environments: The Age of  
602 Genomics. *Annual Review of Ecology, Evolution, and Systematics* 37:67693.
- 603 Hewitt, G. M. 1999. Post-glacial re-colonization of European biota. *Biological Journal of the*  
604 *Linnean Society* 68:876112.
- 605 Hoffman, J. I., F. Simpson, P. David, J. M. Rijks, T. Kuiken, M. A. S. Thorne, R. C. Lacy,  
606 and K. K. Dasmahapatra. 2014. High-throughput sequencing reveals inbreeding  
607 depression in a natural population. *Proceedings of the National Academy of Sciences*  
608 111:377563780.

- 609 Holderegger, R., U. Kamm, and F. Gugerli. 2006. Adaptive vs. neutral genetic diversity:  
610 implications for landscape genetics. *Landscape Ecology* 21:797-807.
- 611 Hughes, A. R., B. D. Inouye, M. T. J. Johnson, N. Underwood, and M. Vellend. 2008.  
612 Ecological consequences of genetic diversity. *Ecology Letters* 11:609-623.
- 613 Hutchison, D., and A. Templeton. 1999. Correlation of pairwise genetic and geographic  
614 distance measure: inferring the relative influences of gene flow and drift on  
615 distribution of genetic variability. *Evolution* 53:1898-1914.
- 616 Jiang, Y., D. I. Bolnick, and M. Kirkpatrick. 2013. Assortative Mating in Animals. *The*  
617 *American Naturalist* 181:E125-E138.
- 618 Jost, L. 2008. GST and its relatives do not measure differentiation. *Molecular Ecology*  
619 17:4015-4026.
- 620 Jung, V., C. H. Albert, C. Violle, G. Kunstler, G. Loucougaray, and T. Spiegelberger. 2013.  
621 Intraspecific trait variability mediates the response of subalpine grassland  
622 communities to extreme drought events. *Journal of Ecology* 102:45-53.
- 623 Kawecki, T. J., and D. Ebert. 2004. Conceptual issues in local adaptation. *Ecology Letters*  
624 7:1225-1241.
- 625 Kawecki, T. J., and R. D. Holt. 2002. Evolutionary consequences of asymmetric dispersal  
626 rates. *The American Naturalist* 160:333-347.
- 627 Lamy, T., F. Laroche, P. David, F. Massol, and P. Jarne. 2017. The contribution of species'  
628 genetic diversity correlations to the understanding of community assembly rules.  
629 *Oikos* 126:759-771.
- 630 Leimar, O. 2005. The Evolution of Phenotypic Polymorphism: Randomized Strategies versus  
631 Evolutionary Branching. *The American Naturalist* 165:669-681.

- 632 Leinonen, T., R. J. S. McCairns, R. B. O'Hara, and J. Merilä. 2013. QST&FST comparisons:  
633 evolutionary and ecological insights from genomic heterogeneity. *Nature Reviews*  
634 *Genetics* 14:179&190.
- 635 Lenormand, T. 2002. Gene flow and the limits to natural selection. *Trends in Ecology &*  
636 *Evolution* 17:183&189.
- 637 Loreau, M. 2000. Biodiversity and ecosystem functioning: recent theoretical advances. *Oikos*  
638 91:3&17.
- 639 Lowe, W. H., R. P. Kovach, and F. W. Allendorf. 2017. Population Genetics and  
640 Demography Unite Ecology and Evolution. *Trends in Ecology & Evolution* 32:141&  
641 152.
- 642 Lowe, W. H., and M. A. McPeck. 2014. Is dispersal neutral? *Trends in Ecology & Evolution*  
643 29:444&450.
- 644 Lytle, D. A., and N. L. Poff. 2004. Adaptation to natural flow regimes. *Trends in Ecology &*  
645 *Evolution* 19:94&100.
- 646 Manel, S., M. K. Schwartz, G. Luikart, and P. Taberlet. 2003. Landscape genetics: combining  
647 landscape ecology and population genetics. *Trends in Ecology & Evolution* 18:189&  
648 197.
- 649 Mimura, M., T. Yahara, D. P. Faith, E. Vázquez-Domínguez, R. I. Colautti, H. Araki, F.  
650 Javadi, J. Núñez-Farfán, A. S. Mori, S. Zhou, P. M. Hollingsworth, L. E. Neaves, Y.  
651 Fukano, G. F. Smith, Y.-I. Sato, H. Tachida, and A. P. Hendry. 2017. Understanding  
652 and monitoring the consequences of human impacts on intraspecific variation.  
653 *Evolutionary Applications* 10:121&139.
- 654 Moran, E. V., F. Hartig, and D. M. Bell. 2015. Intraspecific trait variation across scales:  
655 implications for understanding global change responses. *Global Change Biology*  
656 22:137&150.

- 657 Morrissey, M. B., and D. T. de Kerckhove. 2009. The Maintenance of Genetic Variation Due  
658 to Asymmetric Gene Flow in Dendritic Metapopulations. *The American Naturalist*  
659 174:8756889.
- 660 Nei, M., F. Tajima, and Y. Tateno. 1983. Accuracy of estimated phylogenetic trees from  
661 molecular data. *Journal of Molecular Evolution* 19:1536170.
- 662 Odling-Smee, F. J., K. N. Laland, and M. W. Feldman. 2003. *Niche Construction: The*  
663 *Neglected Process in Evolution*. Princeton University Press, Princeton, NJ and Oxford.
- 664 Outomuro, D., and F. Johansson. 2017. A potential pitfall in studies of biological shape: does  
665 size matter? *Journal of Animal Ecology* 86:144761457.
- 666 Paz-Vinas, I., and S. Blanchet. 2015. Dendritic connectivity shapes spatial patterns of genetic  
667 diversity: a simulation-based study. *Journal of Evolutionary Biology* 28:9866994.
- 668 Paz-Vinas, I., G. Loot, V. M. Stevens, and S. Blanchet. 2015. Evolutionary processes driving  
669 spatial patterns of intra-specific genetic diversity in river ecosystems. *Molecular*  
670 *Ecology* 24:458664604.
- 671 Paz-Vinas, I., E. Quéméré, L. Chikhi, G. Loot, and S. Blanchet. 2013. The demographic  
672 history of populations experiencing asymmetric gene flow: combining simulated and  
673 empirical data. *Molecular Ecology* 22:327963291.
- 674 Pearl, J., and T. Verma. 1987. The logic of representing dependencies by directed graphs.  
675 Pages 3746379 *Proceedings of the sixth National conference on Artificial intelligence*  
676 - Volume 1. AAAI Press, Seattle, WA.
- 677 Pella, H., J. Lejot, N. Lamouroux, and T. Snelder. 2012. Le réseau hydrographique théorique  
678 (RHT) français et ses attributs environnementaux. *Géomorphologie : relief, processus,*  
679 *environnement* 3:3176336.
- 680 Pinheiro, J., D. Bates, S. Debroy, and D. Sarkar. 2016. *nlme: Linear and Nonlinear Mixed*  
681 *Effects Models*.

- 682 Prunier, J. G., V. Dubut, L. Chikhi, and S. Blanchet. 2017. Contribution of spatial  
683 heterogeneity in effective population sizes to the variance in pairwise measures of  
684 genetic differentiation. *Methods in Ecology and Evolution* Early view.
- 685 Quantum GIS Development Team. 2017. Quantum GIS Geographic Information System.  
686 Open Source Geospatial Foundation Project.
- 687 R Development Core Team. 2017. R: A language and environment for statistical computing.  
688 R Foundation for Statistical Computing, Vienna, Austria.
- 689 Raeymaekers, J. A. M., G. E. Maes, S. Geldof, I. Hontis, K. Nackaerts, and F. A. M.  
690 Volckaert. 2008. Modeling genetic connectivity in sticklebacks as a guideline for river  
691 restoration. *Evolutionary Applications* 1:4756488.
- 692 Reed, D. H., and R. Frankham. 2003. Correlation between Fitness and Genetic Diversity.  
693 *Conservation Biology* 17:2306237.
- 694 Relethford, J. H. 1991. Genetic Drift and Anthropometric Variation in Ireland. *Human*  
695 *Biology* 63:1556165.
- 696 Rey, O., E. Danchin, M. Mirouze, C. Loot, and S. Blanchet. 2016. Adaptation to Global  
697 Change: A Transposable Element6Epigenetics Perspective. *Trends in Ecology &*  
698 *Evolution* 31:5146526.
- 699 Rohlf, F. J. 1993. Relative warp analysis and an example of its application to mosquito wings.  
700 Pages 1316160 in L. F. Marcus, E. Bello, and A. Garcia-Valdecasas, editors.  
701 Contribution to Morphometrics. Museo Nacional de Ciencias Naturales, Consejo  
702 Superior de Investigaciones Científicas, CSIC, Madrid.
- 703 Rohlf, F. J., and L. F. Marcus. 1993. A revolution morphometrics. *Trends in Ecology &*  
704 *Evolution* 8:1296132.
- 705 Rohlf, F. J., and D. Slice. 1990. Extensions of the Procrustes Method for the Optimal  
706 Superimposition of Landmarks. *Systematic Biology* 39:40659.

- 707 Rousset, F. 1997. Genetic Differentiation and Estimation of Gene Flow from F-Statistics  
708 Under Isolation by Distance. *Genetics* 145:1219.
- 709 Rousset, F. 2008. genepop007: a complete re-implementation of the genepop software for  
710 Windows and Linux. *Molecular Ecology Resources* 8:1036106.
- 711 Schneider, C. A., W. S. Rasband, and K. W. Eliceiri. 2012. NIH Image to ImageJ: 25 years of  
712 image analysis. *Nature Methods* 9:6716675.
- 713 Sexton, J. P., S. B. Hangartner, and A. A. Hoffmann. 2014. Genetic Isolation by Environment  
714 or Distance: Which Pattern of Gene Flow Is Most Common? *Evolution* 68:1615.
- 715 Shipley, B. 2000. A new inferential test for path models based on directed acyclic graphs.  
716 *Structural Equation Modeling* 7:2066218.
- 717 Shipley, B. 2013. The AIC model selection method applied to path analytic models compared  
718 using a d-separation test. *Ecology* 94:5606564.
- 719 Siefert, A., C. Violle, L. Chalmandrier, C. H. Albert, A. Taudiere, A. Fajardo, L. W. Aarssen,  
720 C. Baraloto, M. B. Carlucci, M. V. Cianciaruso, V. de L. Dantas, F. de Bello, L. D. S.  
721 Duarte, C. R. Fonseca, G. T. Freschet, S. Gaucherand, N. Gross, K. Hikosaka, B.  
722 Jackson, V. Jung, C. Kamiyama, M. Katabuchi, S. W. Kembel, E. Kichenin, N. J. B.  
723 Kraft, A. Lagerström, Y. L. Bagousse-Pinguet, Y. Li, N. Mason, J. Messier, T.  
724 Nakashizuka, J. M. Overton, D. A. Peltzer, I. M. Pérez-Ramos, V. D. Pillar, H. C.  
725 Prentice, S. Richardson, T. Sasaki, B. S. Schamp, C. Schöb, B. Shipley, M. Sundqvist,  
726 M. T. Sykes, M. Vandewalle, and D. A. Wardle. 2015. A global meta-analysis of the  
727 relative extent of intraspecific trait variation in plant communities. *Ecology Letters*  
728 18:140661419.
- 729 Szpiech, Z. A., M. Jakobsson, and N. A. Rosenberg. 2008. ADZE: a rarefaction approach for  
730 counting alleles private to combinations of populations. *Bioinformatics* 24:249862504.

- 731 Taberlet, P., N. E. Zimmermann, T. Englisch, A. Tribsch, R. Holderegger, N. Alvarez, H.  
732 Niklfeld, G. Coldea, Z. Mirek, A. Moilanen, W. Ahlmer, P. A. Marsan, E. Bona, M.  
733 Bovio, P. Choler, E. Cie lak, L. Colli, V. Cristea, J.-P. Dalmás, B. Frajman, L.  
734 Garraud, M. Gaudeul, L. Gielly, W. Gutermann, N. Jogan, A. A. Kagalo, G.  
735 Korbecka, P. Küpfer, B. Lequette, D. R. Letz, S. Manel, G. Mansion, K. Marhold, F.  
736 Martini, R. Negrini, F. Niño, O. Paun, M. Pellecchia, G. Perico, H. Pi ko -Mirkowa,  
737 F. Prosser, M. Pu ca , M. Ronikier, M. Scheuerer, G. M. Schneeweiss, P.  
738 Schönswetter, L. Schratt-Ehrendorfer, F. Schüpfer, A. Selvaggi, K. Steinmann, C.  
739 Thiel-Egenter, M. van Loo, M. Winkler, T. Wohlgemuth, T. Wraber, F. Gugerli, and  
740 IntraBioDiv Consortium. 2012. Genetic diversity in widespread species is not  
741 congruent with species richness in alpine plant communities. *Ecology Letters*  
742 15:143961448.
- 743 Van Oosterhout, C., W. F. Hutchinson, D. P. M. Wills, and P. Shipley. 2004. micro-checker:  
744 software for identifying and correcting genotyping errors in microsatellite data.  
745 *Molecular Ecology Notes* 4:5356538.
- 746 Vannote, R. L., G. W. Minshall, K. W. Cummins, J. R. Sedell, and C. E. Cushing. 1980. The  
747 River Continuum Concept. *Canadian Journal of Fisheries and Aquatic Sciences*  
748 37:1306137.
- 749 Vellend, M. 2005. Species diversity and genetic diversity: parallel processes and correlated  
750 patterns. *The American Naturalist* 166:1996215.
- 751 Vellend, M., G. Lajoie, A. Bourret, C. Múrria, S. W. Kembel, and D. Garant. 2014. Drawing  
752 ecological inferences from coincident patterns of population- and community-level  
753 biodiversity. *Molecular Ecology* 23:289062901.
- 754 Villéger, S., G. Grenouillet, and S. Brosse. 2013. Decomposing functional -diversity reveals  
755 that low functional -diversity is driven by low functional turnover in European fish

- 756 assemblages: Decomposing functional -diversity. *Global Ecology and Biogeography*  
757 22:6716681.
- 758 Villéger, S., N. W. H. Mason, and D. Mouillot. 2008. New multidimensional functional  
759 diversity indices for a multifaceted framework in functional ecology. *Ecology*  
760 89:229062301.
- 761 Villéger, S., P. M. Novack-Gottshall, and D. Mouillot. 2011. The multidimensionality of the  
762 niche reveals functional diversity changes in benthic marine biotas across geological  
763 time. *Ecology Letters* 14:5616568.
- 764 Violle, C., B. J. Enquist, B. J. McGill, L. Jiang, C. H. Albert, C. Hulshof, V. Jung, and J.  
765 Messier. 2012. The return of the variance: intraspecific variability in community  
766 ecology. *Trends in Ecology & Evolution* 27:2446252.
- 767 Violle, C., M.-L. Navas, D. Vile, E. Kazakou, C. Fortunel, I. Hummel, and E. Garnier. 2007.  
768 Let the concept of trait be functional! *Oikos* 116:8826892.
- 769 Wang, I. J., and G. S. Bradburd. 2014. Isolation by environment. *Molecular Ecology*  
770 23:564965662.
- 771 Wang, I. J., and K. Summers. 2010. Genetic structure is correlated with phenotypic  
772 divergence rather than geographic isolation in the highly polymorphic strawberry  
773 poison-dart frog. *Molecular Ecology* 19:4476458.
- 774



775 **Table 1:** General predictions (and underlying processes) regarding the influence of environmental  
776 variables on intraspecific  $\alpha$ -diversity ( $\alpha$ ) and on intraspecific  $\beta$ -diversity.

| <b>(a) Environmental variables</b> | <b>Expected influence on intraspecific <math>\alpha</math>-diversity</b>                                                                                                                                                                                                                                                                                                                   |
|------------------------------------|--------------------------------------------------------------------------------------------------------------------------------------------------------------------------------------------------------------------------------------------------------------------------------------------------------------------------------------------------------------------------------------------|
| Habitat heterogeneity              | Highly heterogeneous sites should harbour populations with higher phenotypic $\alpha$ -diversity. Neutral genetic $\alpha$ -diversity should not be affected.                                                                                                                                                                                                                              |
| Chemicals1                         | Stressful conditions (i.e. high concentrations of chemicals, low oxygen saturation, high temperature) should reduce phenotypic $\alpha$ -diversity by strengthening selective pressures. They should also reduce effective population size and hence both neutral genetic and phenotypic $\alpha$ -diversity through genetic drift.                                                        |
| Chemicals2                         |                                                                                                                                                                                                                                                                                                                                                                                            |
| Oxygen saturation                  |                                                                                                                                                                                                                                                                                                                                                                                            |
| Temperature                        |                                                                                                                                                                                                                                                                                                                                                                                            |
| Habitat area                       | Populations living in large habitats should harbour high population sizes and experience low genetic drift (Prunier et al. 2017), hence increasing both neutral genetic and phenotypic $\alpha$ -diversity.                                                                                                                                                                                |
| Connectivity                       | Sites with high connectivity should receive a high proportion of migrants and hence harbour populations with higher genetic and phenotypic $\alpha$ -diversity.                                                                                                                                                                                                                            |
| Isolation                          | Highly isolated sites should suffer higher genetic drift relatively to gene flow (Fourtune et al. 2016), hence reducing both neutral genetic and phenotypic $\alpha$ -diversity.                                                                                                                                                                                                           |
| <b>(b) Environmental variables</b> | <b>Expected influence on intraspecific <math>\beta</math>-diversity</b>                                                                                                                                                                                                                                                                                                                    |
| Habitat dissimilarity              | Sites with highly dissimilar abiotic conditions should display high phenotypic $\beta$ -diversity due to divergent selection. Additionally, if gene flow between environmentally different sites is hindered by the maladaptation of immigrants (isolation-by-environment, Sexton et al. 2014), we also expect a high genetic $\beta$ -diversity between environmentally dissimilar sites. |
| Difference in chemicals1           |                                                                                                                                                                                                                                                                                                                                                                                            |
| Difference in chemicals2           |                                                                                                                                                                                                                                                                                                                                                                                            |
| Difference in oxygen saturation    |                                                                                                                                                                                                                                                                                                                                                                                            |
| Difference in habitat area         | Heterogeneity in the intensity of genetic drift between sites due to contrasting population sizes should increase both neutral genetic and phenotypic $\beta$ -diversity (Prunier et al. 2017).                                                                                                                                                                                            |
| Difference in connectivity         | Dissimilarities in the intensity of gene flow experienced by populations due to contrasting connectivities should increase both neutral genetic and phenotypic $\beta$ -diversity (Prunier et al. 2017).                                                                                                                                                                                   |
| Riverine distance                  | Sites highly isolated one from each other should experience a decrease of the homogenizing effect of gene flow and an increase of genetic drift between them (isolation-by-distance, Hutchinson and Templeton 1999), hence enhancing both genetic and phenotypic $\beta$ -diversity.                                                                                                       |
| Cumulative altitude difference     |                                                                                                                                                                                                                                                                                                                                                                                            |

777

778

779 **Table 2:** D-sep test statistics used to disentangle the effects of environmental variables on genetic and  
 780 phenotypic  $\alpha$ -diversity (a) and on genetic and phenotypic  $\beta$ -diversity (b) in *Gobio occitaniae* and  
 781 *Phoxinus phoxinus*. For each species and diversity facet, we simplified a full model (i.e. a model  
 782 including all paths described in the main text) until reaching the models with the lowest AIC score  
 783 represented in Figure 5.

| <b>(a) Alpha-intraspecific diversity</b> | C statistics | d.f. | p-value | AIC     |
|------------------------------------------|--------------|------|---------|---------|
| <i>Gobio occitaniae</i>                  |              |      |         |         |
| Complete model                           | 32.569       | 30   | 0.342   | 128.569 |
| Optimal model                            | 75.485       | 74   | 0.430   | 116.791 |
| <i>Phoxinus phoxinus</i>                 |              |      |         |         |
| Complete model                           | 51.971       | 30   | 0.008   | 147.971 |
| Optimal model                            | 76.524       | 72   | 0.335   | 122.524 |
| <b>(b) Bêta-intraspecific diversity</b>  | C statistics | d.f. | p-value | AIC     |
| <i>Gobio occitaniae</i>                  |              |      |         |         |
| Complete model                           | 47.866       | 30   | 0.020   | 167.866 |
| Optimal model                            | 108.119      | 92   | 0.120   | 150.119 |
| <i>Phoxinus phoxinus</i>                 |              |      |         |         |
| Complete model                           | 50.105       | 30   | 0.012   | 170.105 |
| Optimal model                            | 97.058       | 94   | 0.394   | 133.058 |

784

785

786 **Table 3:** Coefficients estimates and significance obtained through full model averaging on the best  
 787 (  $AIC < 4$ ) linear mixed-effects models (one per relative warp and per species) linking relative warps  
 788 to the environmental variables and their associated quadratic terms models.( \*\*\* : p-value < 0.001)

| Environmental variables        | Relative warp 1         |        | Relative warp 2          |           |
|--------------------------------|-------------------------|--------|--------------------------|-----------|
|                                | <i>Gobio occitaniae</i> |        | <i>Phoxinus phoxinus</i> |           |
| Centroid size                  | 0.513***                |        | 0.455***                 | -0.342*** |
| Centroid size <sup>2</sup>     | -0.106***               |        |                          |           |
| Connectivity                   |                         |        | -0.017                   |           |
| Distance from the mouth        |                         |        |                          | 0.018     |
| Distance from the source       |                         |        | -0.025                   |           |
| Habitat area                   |                         |        | -0.016                   |           |
| Slope                          |                         | 0.009  |                          | 0.134     |
| Carbone                        | 0.008                   | -0.048 |                          | -0.002    |
| Carbone <sup>2</sup>           |                         | -0.063 |                          | 0.007     |
| Conductivity                   |                         |        |                          | -0.035    |
| Biological Oxygen Demand       |                         |        | 0.007                    |           |
| Suspended matter               |                         |        |                          | 0.013     |
| pH                             |                         | 0.010  |                          |           |
| pH <sup>2</sup>                |                         | 0.009  |                          |           |
| Oxygen saturation              | 0.272***                | 0.089  | 0.001                    | 0.005     |
| Oxygen saturation <sup>2</sup> |                         |        | 0.006                    |           |
| Temperature                    | -0.236***               |        |                          |           |
| Silt                           | -0.268***               | -0.016 |                          |           |
| Cobble                         | -0.023                  |        |                          |           |
| Large cobble                   |                         | 0.021  |                          |           |
| Boulder                        |                         | 0.007  |                          |           |
| Large boulder                  |                         | 0.045  |                          | 0.080     |

789  
 790  
 791

792 **FIGURE 1**

793 Location of the 48 sites sampled during summers 2014 and 2015 colored according to the  
794 species present.

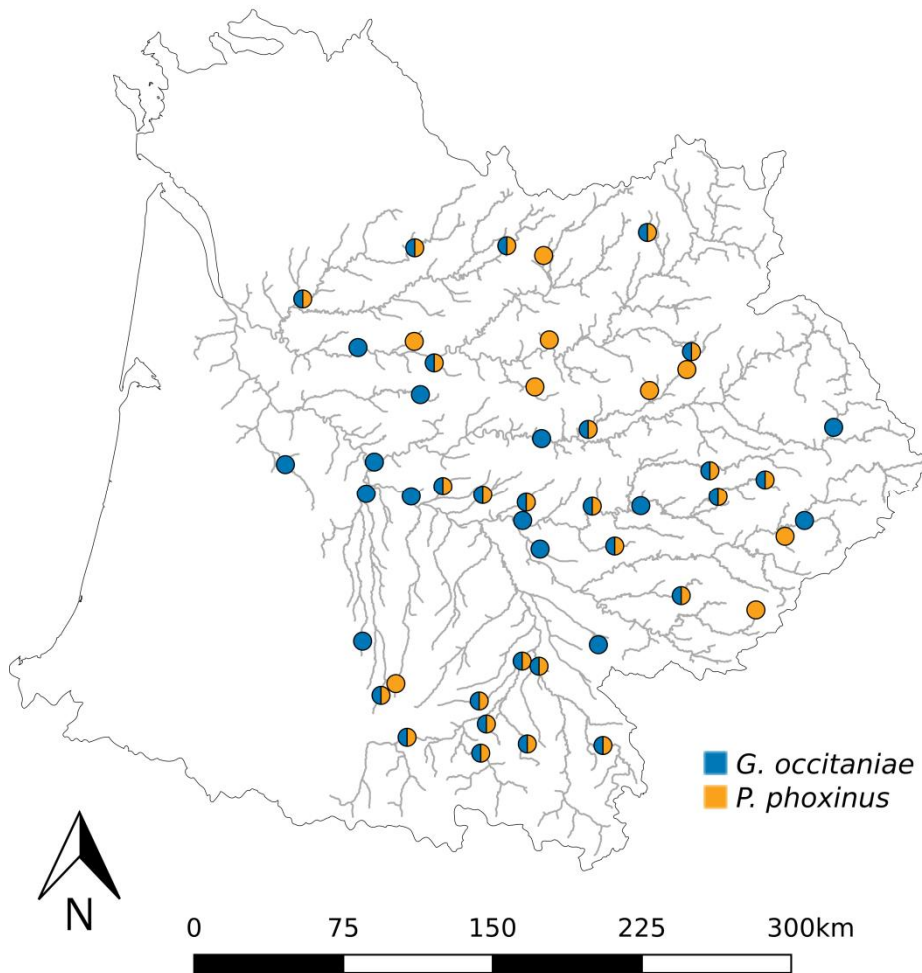

795

796

797 **FIGURE 2**

798 Location of 16 homologous landmarks used to assess phenotypic diversity in *Gobio*  
799 *occitaniae* and *Phoxinus phoxinus*. Landmarks refer to (1) tip of the snout, (2) beginning of  
800 scales coverage on the dorsal outline, (3) anterior and (4) posterior insertions of the dorsal fin,  
801 (5) dorsal insertion of the caudal fin, (6) posterior extremity of the body, (7) ventral insertion  
802 of the caudal fin, (8) anterior insertion of the anal fin, (9) superior insertion of the pectoral fin,  
803 (10) posterior border of the operculum, (11) posterior extremity of the operculum, (12) the  
804 inferior, (13) superior, (14) anterior and (15) posterior extremities of the orbital  
805 circumference, (16) posterior extremity of the premaxillar.

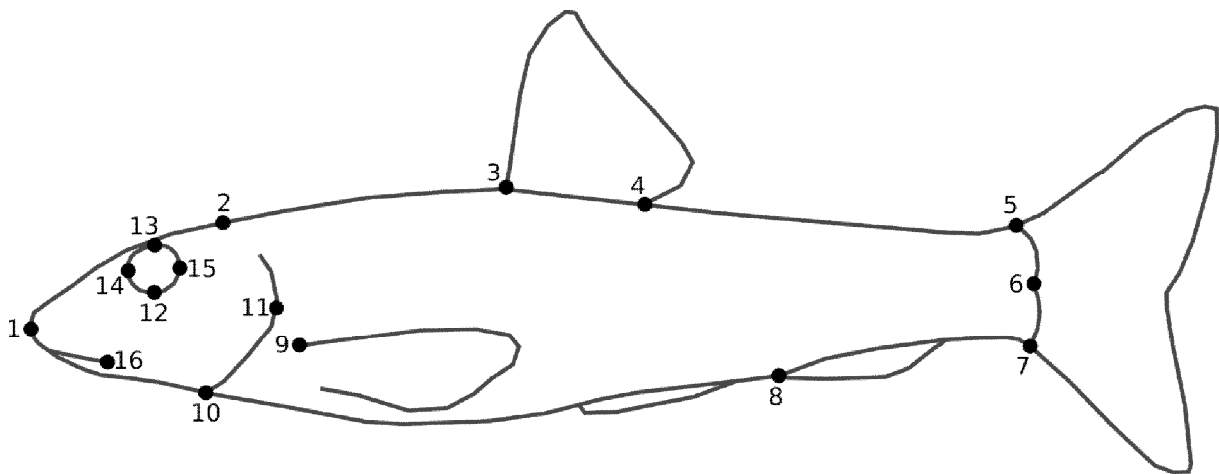

806

807

808

809

810

811

812 **FIGURE 3**

813 Boxplots summarizing the genetic  $\alpha$ -diversity (allelic richness) (a), phenotypic  $\alpha$ -diversity  
814 (proportion of shape space occupied by each population) (b), genetic  $\beta$ -diversity ( $F_{ST}$ ) (c) and  
815 phenotypic  $\beta$ -diversity (euclidean distance between the consensus shapes of each pair of  
816 populations) (d) in *Gobio occitaniae* and *Phoxinus phoxinus*. The solid line within each box  
817 marks the median; the length of the box is the interquartile range (from the first to the third  
818 quartile). The lower whisker extends to the first quartile minus 1.5 times the interquartile  
819 range; the upper whisker extends to the third quartile plus 1.5 times the interquartile range.  
820 Diamonds represent the data points which are beyond the whiskers.

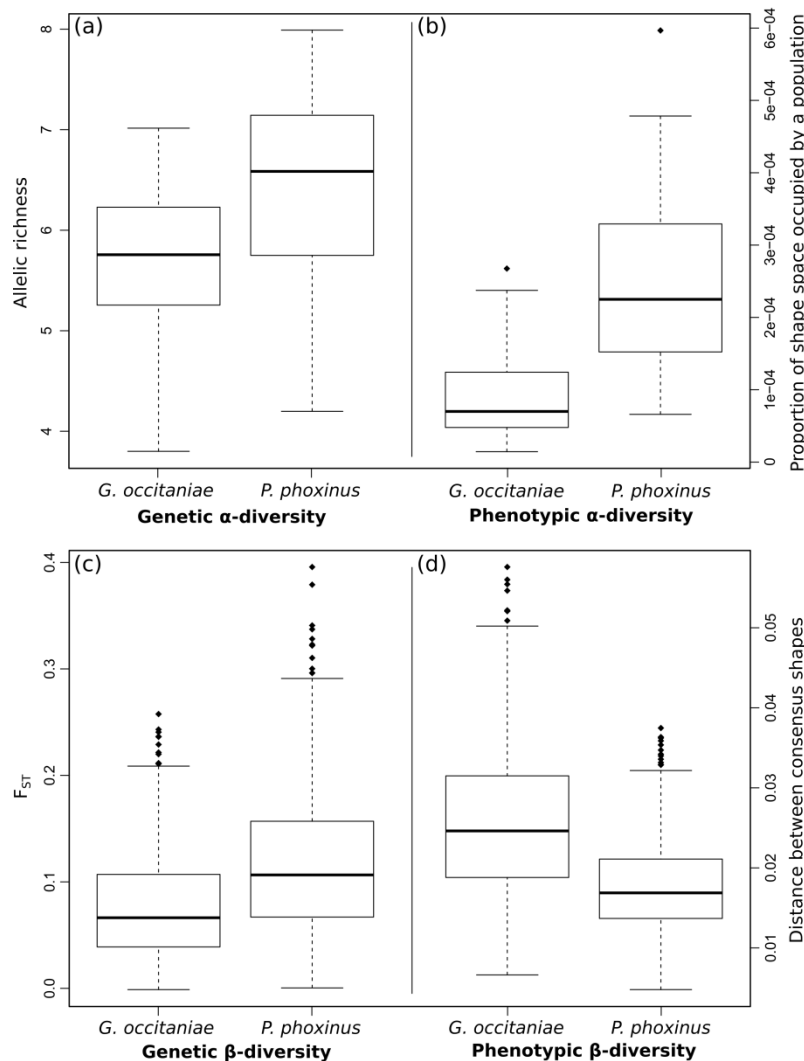

821

822

823 **FIGURE 4**

824 Genetic  $\alpha$ -diversity (allelic richness) of *Gobio occitaniae* (a) and *Phoxinus phoxinus* (b)  
825 plotted against phenotypic  $\alpha$ -diversity (proportion of shape space occupied by each  
826 population) with Spearman's rho and associated P-values; and genetic  $\beta$ -diversity (FST) of  
827 *Gobio occitaniae* (c) and *Phoxinus phoxinus* (d) plotted against  $\beta$ -diversity (euclidean  
828 distance between the consensus shapes of each pair of populations) with Mantel's r and  
829 associated P-values.

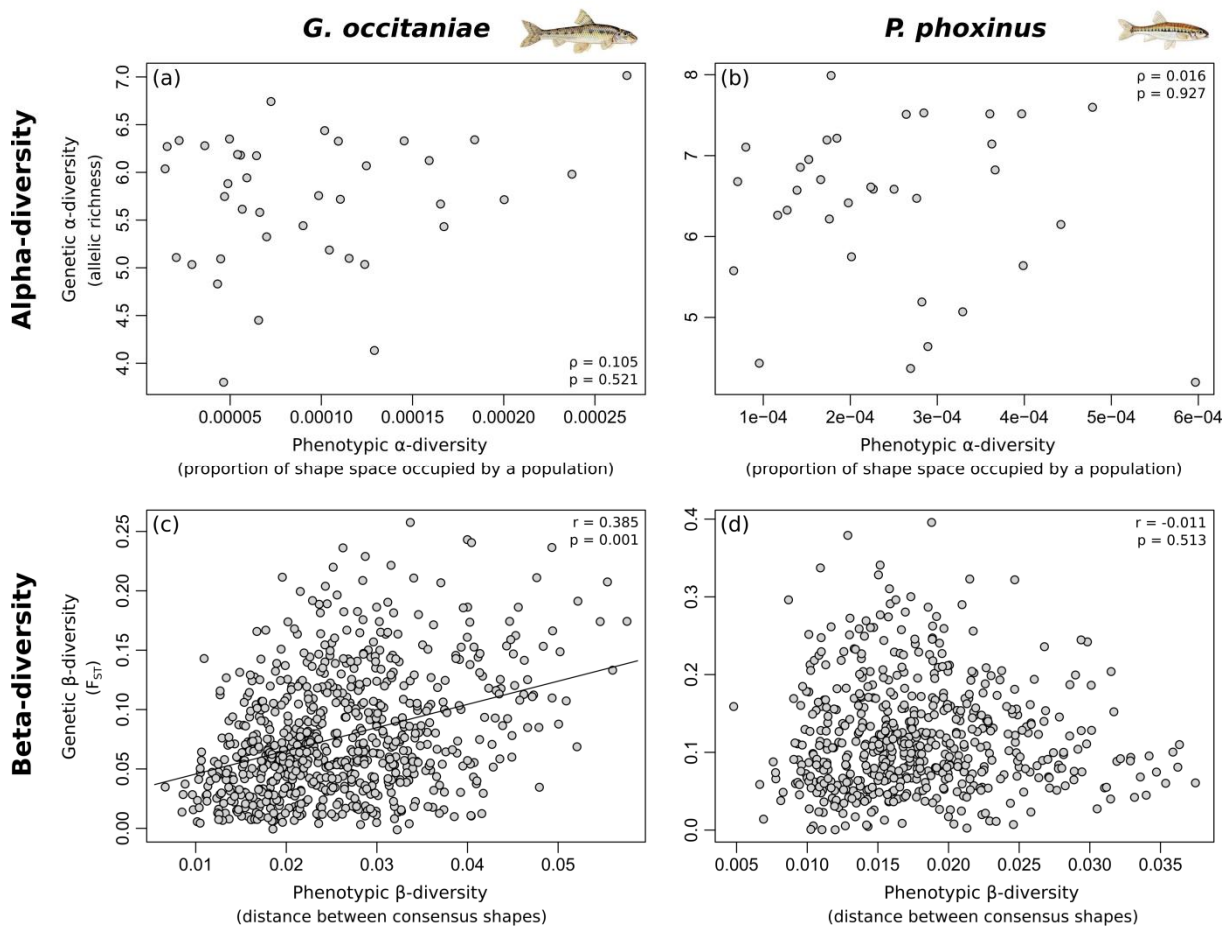

830

831

832 **FIGURE 5**

833 Graphical representations of the models describing the causal relationships between  
 834 environmental variables and genetic and phenotypic  $\alpha$ -diversity in *Gobio occitaniae* (a) and  
 835 *Phoxinus phoxinus* (b), and between environmental variables and genetic and phenotypic  $\beta$ -  
 836 diversity in *Gobio occitaniae* (a) and *Phoxinus phoxinus* (b), obtained using the d-sep test.  
 837 Single-headed arrows indicate a causal path. Solid and dashed lines stand for positive and  
 838 negative values, respectively.

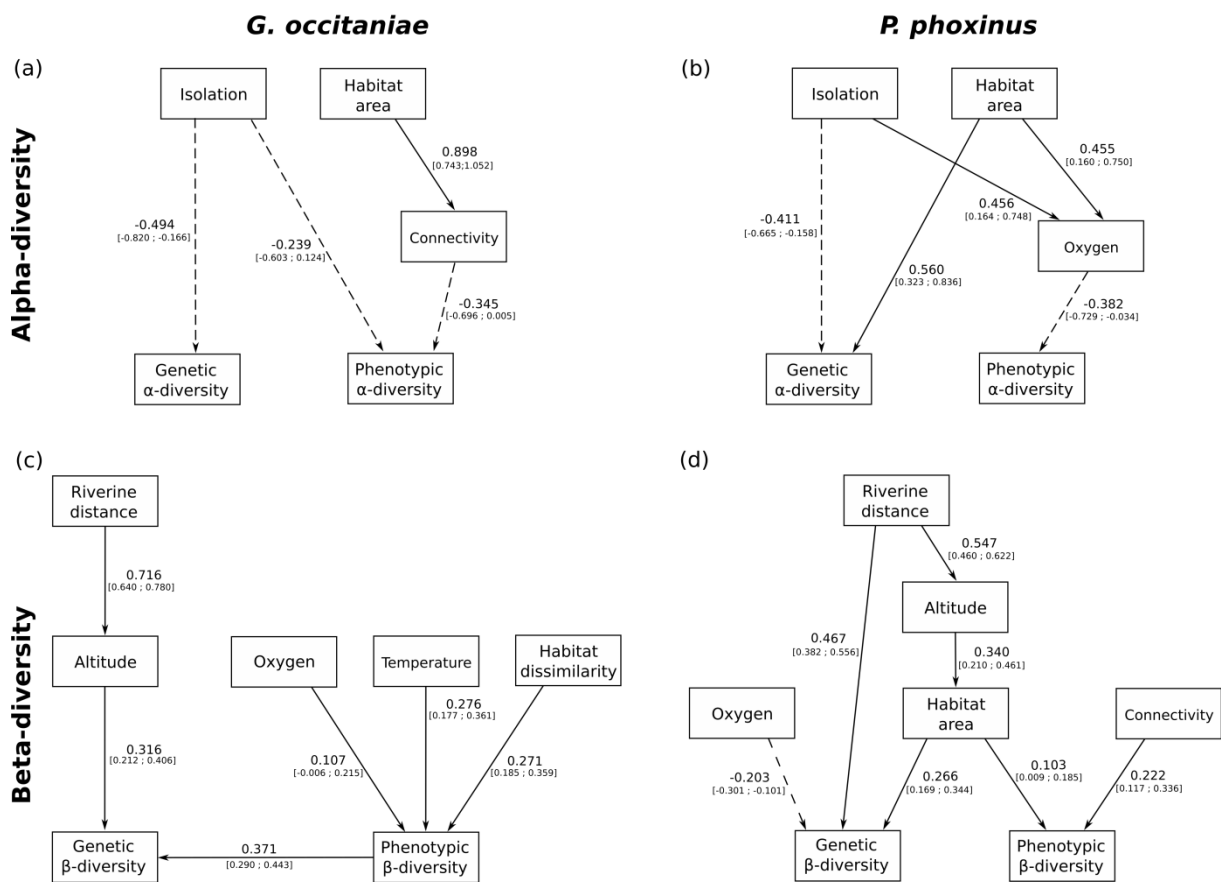

839

840
